# Supplementary material for: Collaboration and conflict: structural causes and researcher responses in university STEM labs
Source: Research Square preprint supplement (doi:10.21203/rs.3.rs-6676661/v1), 2025-06-14
Supplement: Supplementary file 1 [file 6629e998454f3bd7c5ad18c9.pdf]

## Supplementary Material

This table presents the conflict handling strategies identified in each episode across university STEM laboratories. Strategies were classified according to the Thomas and Kilmann framework (Competing, Avoiding, Compromising, Collaborating, Accommodating, Unidentified). Frequencies indicate the number of episodes in which each strategy was observed.

See Supplementary Table 1 for a detailed episode-by-episode typological analysis.

| Code       | Description of Conflict Episode                                                   | Conflict Handling Style |                  |                              |                           |                               |                          |
|------------|-----------------------------------------------------------------------------------|-------------------------|------------------|------------------------------|---------------------------|-------------------------------|--------------------------|
|            |                                                                                   | Co<br>mp<br>etin<br>g   | Avo<br>idin<br>g | Co<br>mp<br>ro<br>mis<br>ing | Coll<br>abo<br>rati<br>ng | Acc<br>om<br>mo<br>dati<br>ng | Uni<br>den<br>tifie<br>d |
|            | Frequency                                                                         | 1                       | 4                | 4                            | 0                         | 23                            | 8                        |
| Epi01_PS01 | Psychological distress caused by a collaborator team's no-show                    |                         |                  |                              |                           | V                             |                          |
| Epi02_PS01 | Miscommunication in data interpretation due to disciplinary differences           |                         |                  | V                            |                           |                               |                          |
| Epi03_PS01 | Authorship conflict with a collaborator team                                      |                         |                  |                              |                           |                               | V                        |
| Epi04_PS02 | Mental stress caused by administrative burdens                                    | V                       |                  |                              |                           | V                             |                          |
| Epi05_PS02 | Unilateral instruction from a PhD researcher to revise a manuscript               |                         |                  |                              |                           | V                             |                          |
| Epi06_PS02 | Research delays due to equipment issues from the collaborator team                |                         |                  |                              |                           | V                             |                          |
| Epi07_PS03 | Loss of research direction due to miscommunication among collaborating professors |                         |                  |                              |                           | V                             |                          |
| Epi08_PS03 | Breakdown of communication within the lab                                         |                         |                  |                              |                           | V                             |                          |
| Epi09_PS03 | Breach of agreed role assignments                                                 |                         |                  | V                            |                           |                               |                          |
| Epi10_PS03 | A researcher burdened by an imbalanced role allocation                            |                         |                  |                              |                           | V                             |                          |
| Epi11_PS03 | Authorship conflict                                                               |                         |                  |                              |                           |                               | V                        |
| Epi12_PS04 | Inefficient communication                                                         |                         |                  |                              |                           |                               | V                        |
| Epi13_PS04 | Authorship conflict                                                               |                         |                  |                              |                           |                               | V                        |
| Epi14_PS04 | Ambiguity in role assignment                                                      |                         | V                |                              |                           |                               |                          |
| Epi15_PS04 | Misjudgment of contribution by the professor                                      |                         | V                |                              |                           |                               |                          |
| Epi16_PS04 | Professor taking credit for a postdoc's achievements                              |                         |                  |                              |                           |                               | V                        |
| Epi17_PS05 | Professor's disparaging remarks about a senior researcher during collaboration    |                         |                  |                              |                           |                               | V                        |
| Epi18_PS05 | Senior researcher disregarding a junior researcher's opinion                      |                         |                  |                              |                           | V                             |                          |
| Epi19_PS05 | Lack of communication between two senior researchers                              |                         |                  |                              |                           | V                             |                          |
| Epi20_PS05 | Authorship conflict                                                               |                         |                  |                              |                           | V                             |                          |
| Epi21_PS06 | Project delay                                                                     |                         |                  |                              |                           | V                             |                          |
| Epi22_S01  | Authorship conflict due to mismatched expectations                                |                         |                  |                              |                           | V                             |                          |

|           |                                                                              |   |   |
|-----------|------------------------------------------------------------------------------|---|---|
| Epi23_S01 | Professor's conflict handling approach to communication problems             |   | V |
| Epi24_S01 | Avoidance of responsibility                                                  |   | V |
| Epi25_S01 | Research delay caused by an inexperienced researcher                         |   | V |
| Epi26_S02 | Research delay due to role conflict and power imbalance                      |   | V |
| Epi27_S02 | Mental stress caused by excessive workload                                   |   | V |
| Epi28_S02 | Authorship conflict arising from role conflict                               |   | V |
| Epi29_S03 | Research delay caused by professor's power                                   | V |   |
| Epi30_S03 | Authorship conflict caused by role conflict                                  |   | V |
| Epi31_S04 | Overwork due to shortage of human resources                                  |   | V |
| Epi32_S04 | Research delay caused by an inexperienced researcher                         |   | V |
| Epi33_S05 | Emotional distress due to hierarchical decision-making structure             | V |   |
| Epi34_S05 | Miscommunication in data interpretation due to disciplinary differences      |   | V |
| Epi35_S05 | Mental stress caused by unilateral instruction and inefficient communication |   | V |
| Epi36_S09 | Research delay due to absence of shared goals and overreliance on data       |   | V |
| Epi37_S09 | Lack of research continuity in a long-term project                           | V |   |
| Epi38_S11 | Research ethics issue caused by role conflict                                | V |   |
| Epi39_S11 | Authorship conflict caused by communication problems                         |   | V |

---

**Supplemental Table1. Episode-Based Frequencies of Conflict Handling Style Adopted by Researchers in University STEM Laboratories**
